# Supplementary material for: Discovery and validation of breast cancer subtypes
Source: PubMed Central journal article supplement (PMC1574316; doi:10.1186/1471-2164-7-231), 2006-09-11
Supplement: 1471-2164-7-231-S2.pdf [file 1471-2164-7-231-S2.pdf]

Pairs of genes resulting in three groups all validated in the training dataset at the  $\alpha = 0.05$  significance level - The pairs of genes which induced three sample groups which all validated in the training dataset ( $\alpha = 0.05$ ) are listed. The first column lists the first gene in the pairs and the second column lists the second genes in the pairs. The UniGene Cluster ID is provided when the gene symbol is unavailable. The pairs of genes in **bold** defined three sample groups all of which were validated at the  $\alpha = 0.05$  significance level in all three validation datasets.

| <b>First gene</b> | <b>Second gene(s)</b>                                                                                                             |
|-------------------|-----------------------------------------------------------------------------------------------------------------------------------|
| Hs.512126         | Hs.432677, <i>HIST1H1C</i>                                                                                                        |
| Hs.512643         | <i>CXCL13</i> , <i>HPN</i>                                                                                                        |
| Hs.1657           | Hs.64568, <i>PDZK1IP1</i> , <i>SOX10</i> , Hs.332649, <i>KRTAP10-11</i> , Hs.432677, Hs.524293, <i>GRB7</i> , <i>ABCC11</i>       |
| <i>ESR1</i>       | Hs.64568, <i>PDZK1IP1</i> , <i>KRTAP10-11</i> , Hs.524293, <i>GRB7</i> , <i>ABCC11</i> , Hs.375600                                |
| Hs.64568          | Hs.432677, <i>SERPINB5</i> , Hs.530509                                                                                            |
| <b>BCMP11</b>     | <i>SOX10</i> , <i>KRTAP10-11</i> , <i>PIP</i> , <b>ABCC11</b>                                                                     |
| <i>PDZK1IP1</i>   | <i>SOX10</i> , <i>SAA2</i> , Hs.54451, Hs.530509                                                                                  |
| <i>PKP1</i>       | <i>SLC39A6</i> , <i>KRTAP10-11</i> , <i>LBP</i>                                                                                   |
| <i>CALML5</i>     | <i>KRTAP10-11</i>                                                                                                                 |
| <i>CXCL13</i>     | <i>CXCL1</i>                                                                                                                      |
| Hs.109425         | <i>SOX10</i> , <i>STC2</i>                                                                                                        |
| Hs.444372         | <i>CHAD</i> , <i>APOD</i> , <i>CYP4Z1</i>                                                                                         |
| Hs.7413           | Hs.155223, <i>STC2</i> , Hs.524293, Hs.251754                                                                                     |
| <b>SLC39A6</b>    | Hs.473695, Hs.169946, <b>GATA3</b>                                                                                                |
| Hs.155956         | <i>GSTT1</i>                                                                                                                      |
| Hs.458430         | Hs.332649, <i>GSTT1</i>                                                                                                           |
| Hs.405944         | <i>SERPINB5</i> , <i>SILV</i>                                                                                                     |
| <i>IGL@</i>       | <i>SERPINB5</i>                                                                                                                   |
| <i>SOX10</i>      | Hs.416854, Hs.155223, <i>STC2</i> , Hs.391828, <i>C1orf64</i> , <i>LBP</i> , <i>GRB7</i> , <i>TRPV6</i> , Hs.117874, <i>PCSK6</i> |
| <i>SAA2</i>       | <i>MAOB</i>                                                                                                                       |
| Hs.416854         | <i>ERBB2</i> , <i>PIP</i>                                                                                                         |

Pairs of genes resulting in three groups all validated in the training dataset at the  $\alpha = 0.05$  significance level - The pairs of genes which induced three sample groups which all validated in the training dataset ( $\alpha = 0.05$ ) are listed. The first column lists the first gene in the pairs and the second column lists the second genes in the pairs. The UniGene Cluster ID is provided when the gene symbol is unavailable. The pairs of genes in **bold** defined three sample groups all of which were validated at the  $\alpha = 0.05$  significance level in all three validation datasets.

|                   |                                                            |
|-------------------|------------------------------------------------------------|
| Hs.458275         | <i>KRT23</i>                                               |
| <i>RERG</i>       | <i>GRB7</i>                                                |
| Hs.525874         | <i>APOD</i> , Hs.75736                                     |
| <i>CA12</i>       | Hs.391828                                                  |
| Hs.279916         | Hs.391828, <i>LBP</i>                                      |
| <i>DNALI1</i>     | <i>ERBB2</i> , <i>GRB7</i> , <i>LTF</i>                    |
| <i>CHAD</i>       | <i>HIST1H1C</i> , <i>TSPAN1</i>                            |
| <i>TRIM29</i>     | <i>LBP</i> , <i>KRT20</i>                                  |
| <i>C1orf64</i>    | <i>ERBB2</i>                                               |
| <i>KRTAP10-11</i> | <i>ABCC11</i>                                              |
| <i>LBP</i>        | <i>TSPAN1</i> , Hs.524293, <i>SERPINB5</i>                 |
| Hs.432677         | <i>PLIN</i> , <i>ERBB2</i> , <i>GRB7</i>                   |
| Hs.524438         | <i>ERBB2</i> , <i>PCSK6</i>                                |
| <i>HIST1H1C</i>   | <i>ERBB2</i>                                               |
| <i>CYP4X1</i>     | <i>TFF3</i>                                                |
| <i>TSPAN1</i>     | <i>SERPINA3</i> , <i>HMGCS2</i>                            |
| <i>PLIN</i>       | <i>GRB7</i> , <i>SERPINB5</i> , <i>TFF3</i> , Hs.430324    |
| Hs.524293         | <i>HMGCS2</i>                                              |
| <i>ERBB2</i>      | <i>LTF</i> , <i>GATA3</i> , Hs.54451, Hs.530509, Hs.449587 |
| <i>GRB7</i>       | Hs.515966, <i>GATA3</i> , Hs.36563                         |
| <i>SERPINB5</i>   | Hs.525647                                                  |
| Hs.24395          | <i>FN3K</i>                                                |
| <i>SILV</i>       | Hs.515966                                                  |
| <i>LTF</i>        | Hs.97774                                                   |
| <i>FN3K</i>       | <i>AREG</i>                                                |

Pairs of genes resulting in three groups all validated in the training dataset at the  $\alpha = 0.05$  significance level - The pairs of genes which induced three sample groups which all validated in the training dataset ( $\alpha = 0.05$ ) are listed. The first column lists the first gene in the pairs and the second column lists the second genes in the pairs. The UniGene Cluster ID is provided when the gene symbol is unavailable. The pairs of genes in **bold** defined three sample groups all of which were validated at the  $\alpha = 0.05$  significance level in all three validation datasets.

|                |                                     |
|----------------|-------------------------------------|
| <i>HPN</i>     | <i>AREG</i>                         |
| <i>CCL19</i>   | Hs.430324                           |
| <i>PIP</i>     | <i>CACNA1H</i>                      |
| Hs.97774       | <i>ABCC11</i>                       |
| <i>MAPT</i>    | <i>ABCC11</i>                       |
| Hs.54451       | <i>DHRS2</i>                        |
| Hs.530509      | <i>DHRS2</i>                        |
| <i>TFF3</i>    | <i>PCSK6</i>                        |
| Hs.430324      | Hs.413924                           |
| <i>CACNA1H</i> | <i>NELL2</i> , Hs.375600, Hs.332053 |
| <i>PCSK6</i>   | <i>IGSF1</i>                        |
| <i>ABCC11</i>  | Hs.525647, <i>MAOB</i>              |
| <i>AREG</i>    | <i>GRB14</i>                        |
